# Supplementary material for: Microbial Succession and Flavor Production in the Fermented Dairy Beverage Kefir
Source: PubMed Central journal article supplement (PMC5080400; doi:10.1128/msystems.00052-16), 2016-10-04
Supplement: sys005162055sf1.pdf [file sys005162055sf1.pdf]

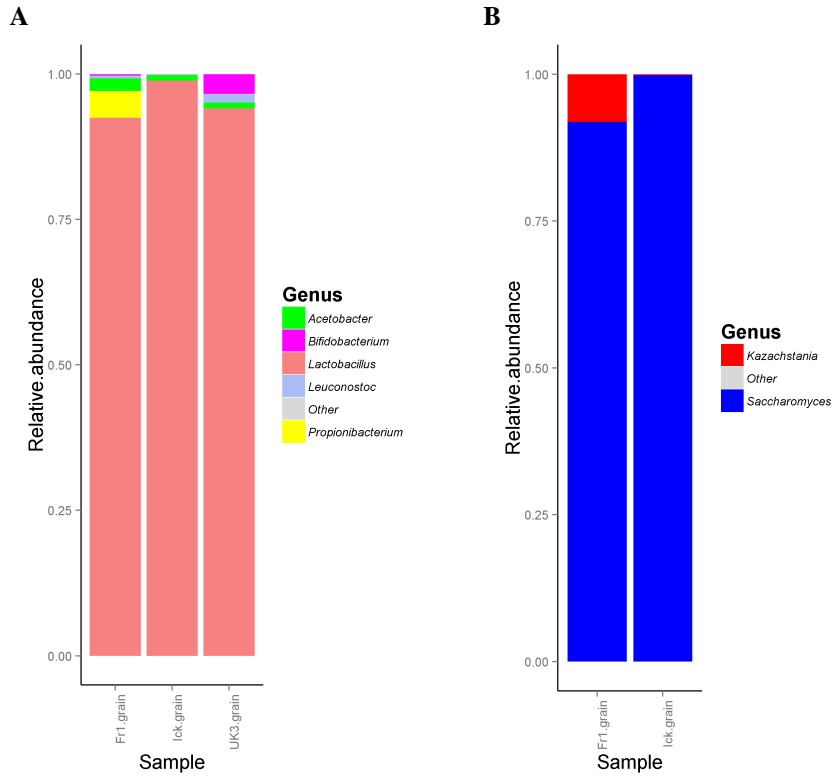

**Figure S1. The (a) bacterial and (b) fungal composition of kefir grains, as determined by amplicon sequencing.** Note that we were unable to generate an ITS amplicon for the UK3 sample.
