# Supplementary material for: Microbial Succession and Flavor Production in the Fermented Dairy Beverage Kefir
Source: PubMed Central journal article supplement (PMC5080400; doi:10.1128/msystems.00052-16), 2016-10-04
Supplement: sys005162055sf5.pdf [file sys005162055sf5.pdf]

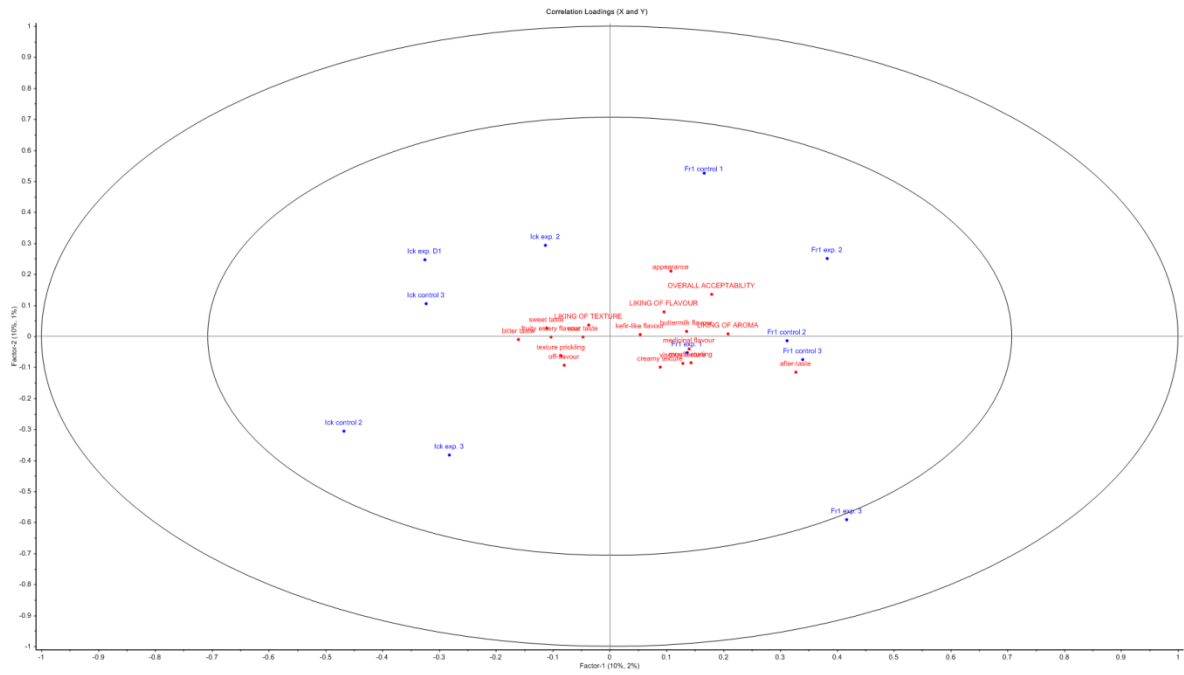

**Figure S5. ANOVA-Partial Least Squares Regression (ASLPR, PCs 1-2) plot for spiked and non-spiked kefir samples, presented are Sensory Acceptance and Ranking Descriptive Analysis data.**
