# Supplementary material for: Microbial Succession and Flavor Production in the Fermented Dairy Beverage Kefir
Source: PubMed Central journal article supplement (PMC5080400; doi:10.1128/msystems.00052-16), 2016-10-04
Supplement: sys005162055st1.pdf [file sys005162055st1.pdf]

**Table S1. Absolute abundances of bacteria and fungi in kefir samples after 0, 8 and 24 hours of fermentation, as determined by quantitative PCR (qPCR) measurements.**

| <b>Sample</b> | <b>Total fungi (ng of fungal DNA)</b> | <b>Total bacteria (copies of 16S rRNA gene)</b> |
|---------------|---------------------------------------|-------------------------------------------------|
| Milk 0 h      | 0.0016                                | 1.78E+05                                        |
| Fr1 08 h      | 0.1386                                | 7.64E+07                                        |
| Fr1 24 h      | 0.2179                                | 2.49E+08                                        |
| Ick 08 h      | 0.0542                                | 2.62E+08                                        |
| Ick 24 h      | 0.0972                                | 1.63E+08                                        |
| UK3 08 h      | 0.0896                                | 7.86E+07                                        |
| Uk3 24 h      | 0.3933                                | 4.22E+08                                        |
